# Supplementary material for: Transposable elements in a clade of three tetraploids and a diploid relative, focusing on Gypsy amplification
Source: PubMed Central journal article supplement (PMC4381496; doi:10.1186/s13100-015-0034-8), 2015-03-25

## Gypsy

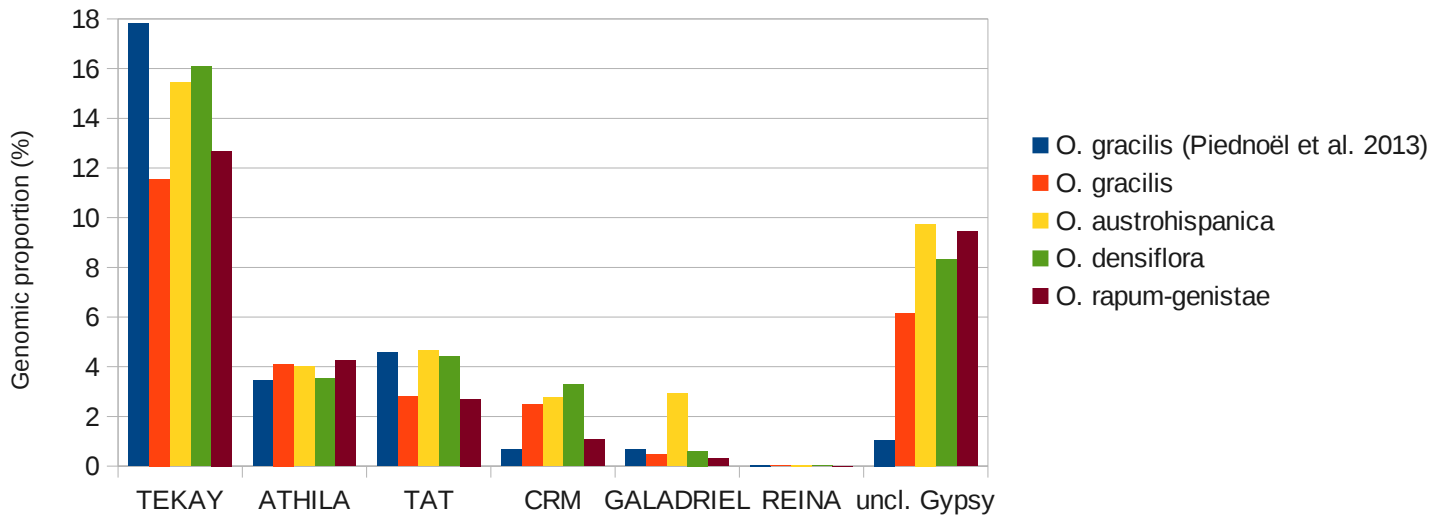

## Unclassified Gypsy

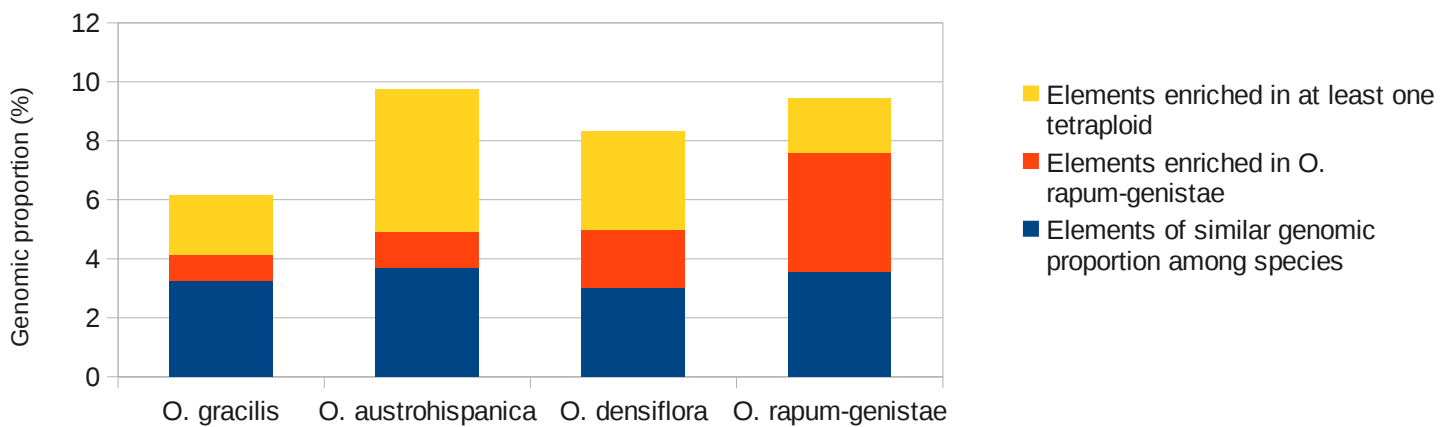

## Copia

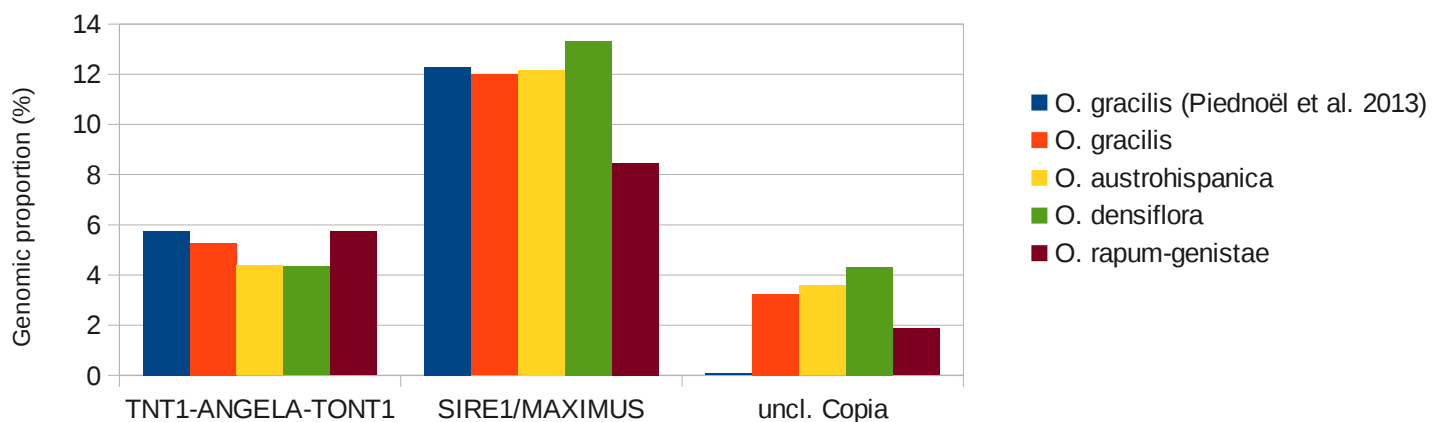

Supplement: 13100_2015_34_MOESM1_ESM.pdf [file 13100_2015_34_MOESM1_ESM.pdf]
